# Supplementary material
Source: PubMed Central journal article supplement (PMC2910549)
Supplement: NIHMS186697-supplement-supplement_1.pdf [file NIHMS186697-supplement-supplement_1.pdf]

## Supplemental Tables

**Sample correlations, sample variances, and discrepancies (N=104)**

|                                 | 1.   | 2.   | 3.   | 4.    | 5.    | 6.    | 7.    | 8.    | 9.    | 10.   |
|---------------------------------|------|------|------|-------|-------|-------|-------|-------|-------|-------|
| 1. Karnofsky Performance Status | 93.3 | 0.00 | 0.00 | 0.01  | 0.14  | 0.07  | 0.25  | 0.02  | -0.02 | 0.06  |
| 2. Distant disease              | -.20 | 0.20 | 0.00 | -0.05 | 0.01  | 0.01  | -0.04 | -0.01 | -0.01 | 0.07  |
| 3. Partner Status               | .13  | -.11 | 0.20 | 0.18  | 0.16  | 0.21  | 0.07  | -0.02 | 0.09  | 0.01  |
| 4. Norepinephrine               | -.01 | .05  | -.18 | 89680 | -0.01 | -0.02 | -0.03 | 0.13  | 0.04  | 0.1   |
| 5. Cortisol                     | -.14 | -.01 | -.16 | .31   | 32.9  | -0.06 | 0.03  | -0.18 | -0.25 | -0.24 |
| 6. ACTH                         | -.07 | -.01 | -.21 | .47   | .56   | 579.5 | -0.02 | -0.05 | 0.01  | -0.05 |
| 7. Epinephrine                  | -.25 | .04  | -.07 | .47   | .45   | .75   | 16753 | -0.21 | -0.13 | -0.15 |
| 8. Fatigue (FSI)                | -.52 | .20  | -.15 | -.03  | .29   | .22   | .37   | 6.50  | -0.02 | 0.00  |
| 9. Depression (CES-D)           | -.45 | .18  | -.26 | .06   | .35   | .16   | .28   | .70   | 83.3  | 0.00  |
| 10. Pain (BPI)                  | -.51 | .09  | -.17 | -.01  | .34   | .20   | .30   | .65   | .62   | 362.3 |

Note: Sample correlations are provided below the diagonal, sample variances are on the diagonal, and the discrepancies between sample correlations and the correlations implied by the model are above the diagonal. CES-D=Center for Epidemiological Studies – Depression Scale, BPI=Brief Pain Inventory, FSI=Fatigue Symptom Inventory

**Parameter estimates**

|                           |                      | Estimate       | Standard Error | Standardized Estimate | P     |
|---------------------------|----------------------|----------------|----------------|-----------------------|-------|
| <b>Regression Weights</b> |                      |                |                |                       |       |
| BPI                       | <--- PDF             | 10.89          | 1.39           | .77                   | <.001 |
| CESD                      | <--- PDF             | 5.44           | 0.65           | .80                   | <.001 |
| FSI                       | <--- PDF             | 1.62           | 0.18           | .85                   | <.001 |
| Cortisol                  | <--- HPA / SNS       | 3.24           | 0.63           | .57                   | <.001 |
| ACTH                      | <--- HPA / SNS       | 20.46          | 2.46           | .87                   | <.001 |
| Epinephrine               | <--- HPA / SNS       | 106.50         | 13.18          | .84                   | <.001 |
| Norepinephrine            | <--- HPA / SNS       | 154.79         | 33.82          | .52                   | <.001 |
| PDF                       | <--- KPS             | -0.08          | 0.01           | -.56                  | <.001 |
| PDF                       | <--- Distant Disease | 0.27           | 0.26           | .09                   | .294  |
| PDF                       | <--- Partner Status  | -0.35          | 0.25           | -.12                  | .162  |
| PDF                       | <--- HPA / SNS       | 0.30           | 0.15           | .23                   | .039  |
| <b>Covariances</b>        |                      |                |                |                       |       |
| Partner Status            | <-->Distant Disease  | -0.02          | 0.02           | -.11                  | .275  |
| Distant Disease           | <-->KPS              | -0.89          | 0.44           | -.20                  | .045  |
| Partner Status            | <-->KPS              | 0.58           | 0.45           | .13                   | .201  |
| <b>Variances</b>          |                      |                |                |                       |       |
| HPA / SNS                 |                      | 1 <sup>a</sup> |                |                       |       |
| Partner Status            |                      | 0.22           | 0.03           |                       | <.001 |
| Distant Disease           |                      | 0.21           | 0.03           |                       | <.001 |
| KPS                       |                      | 92.39          | 12.94          |                       | <.001 |
| E – PDF                   |                      | 1 <sup>a</sup> |                |                       |       |
| E – BPI                   |                      | 144.90         | 27.26          |                       | <.001 |

|                    | Estimate | Standard Error | Standardized Estimate | P     |
|--------------------|----------|----------------|-----------------------|-------|
| E – CES-D          | 28.60    | 5.81           |                       | <.001 |
| E – FSI            | 1.73     | 0.43           |                       | <.001 |
| E – Cortisol       | 21.90    | 3.79           |                       | <.001 |
| E – ACTH           | 132.02   | 53.05          |                       | .013  |
| E – Epinephrine    | 4900.19  | 1534.69        |                       | .001  |
| E – Norepinephrine | 63859.5  | 11020.7        |                       | <.001 |
| <b>Means</b>       |          |                |                       |       |
| KPS                | 75.72    | 0.95           |                       | <.001 |
| Distant Disease    | 0.70     | 0.04           |                       | <.001 |
| Partner Status     | 1.66     | 0.05           |                       | <.001 |
| <b>Intercepts</b>  |          |                |                       |       |
| BPI                | 81.50    | 12.71          |                       | <.001 |
| CES-D              | 47.35    | 6.15           |                       | <.001 |
| FSI                | 13.09    | 1.76           |                       | <.001 |
| Cortisol           | 9.93     | 0.63           |                       | <.001 |
| ACTH               | 19.90    | 2.68           |                       | <.001 |
| Epinephrine        | 85.09    | 14.30          |                       | <.001 |
| Norepinephrine     | 553.78   | 33.51          |                       | <.001 |

<sup>a</sup> Parameter prespecified for scaling purposes.

Note: E=error term, ACTH=adrenocorticotrophic hormone, HPA=hypothalamic-pituitary-adrenal axis,

PDF=pain, depression, and fatigue, CES-D=Center for Epidemiological Studies – Depression Scale,

KPS=Karnofsky Performance Status scale, BPI=Brief Pain Inventory, FSI=Fatigue Symptom Inventory.
